# Supplementary material for: Three New Tetranorditerpenes from Aerial Parts of Acerola Cherry (Malpighia emarginata)
Source: PubMed Central journal article supplement (PMC6270683; doi:10.3390/molecules19022629), 2014-02-24

# Supporting Information

**Figure S1.** The dose response curve of compounds 1–3 and cisplatin at each tested cell lines.

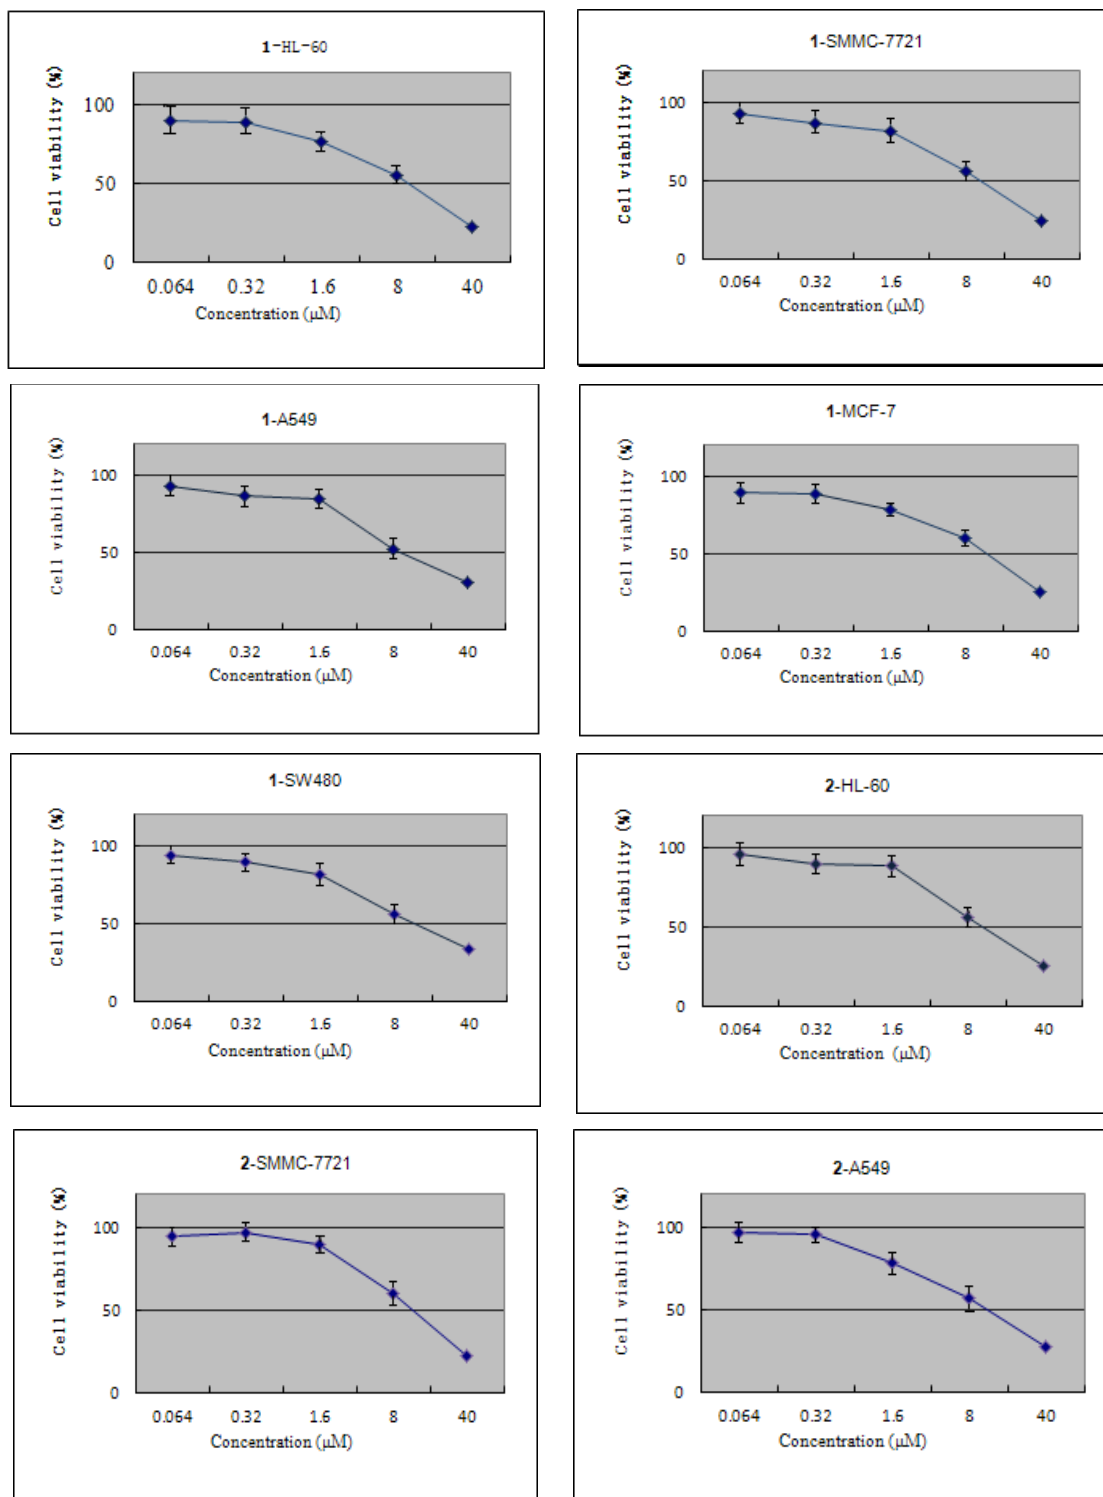

Figure S1. Cont.

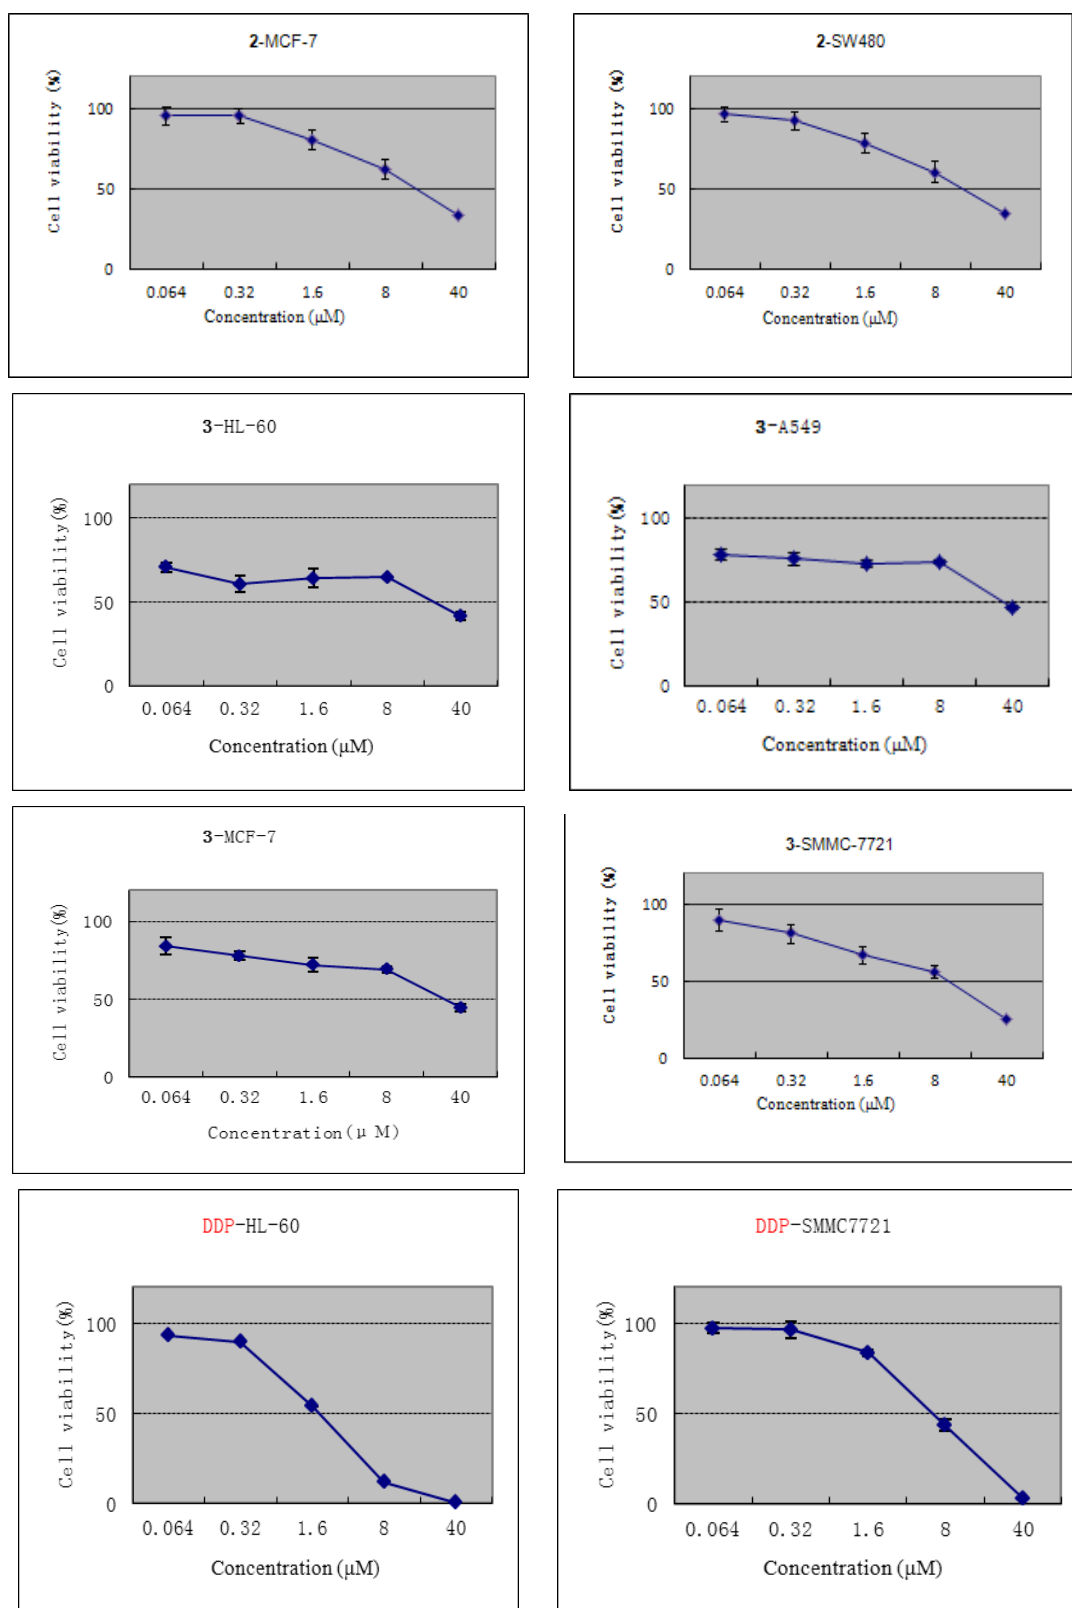

Figure S1. Cont.

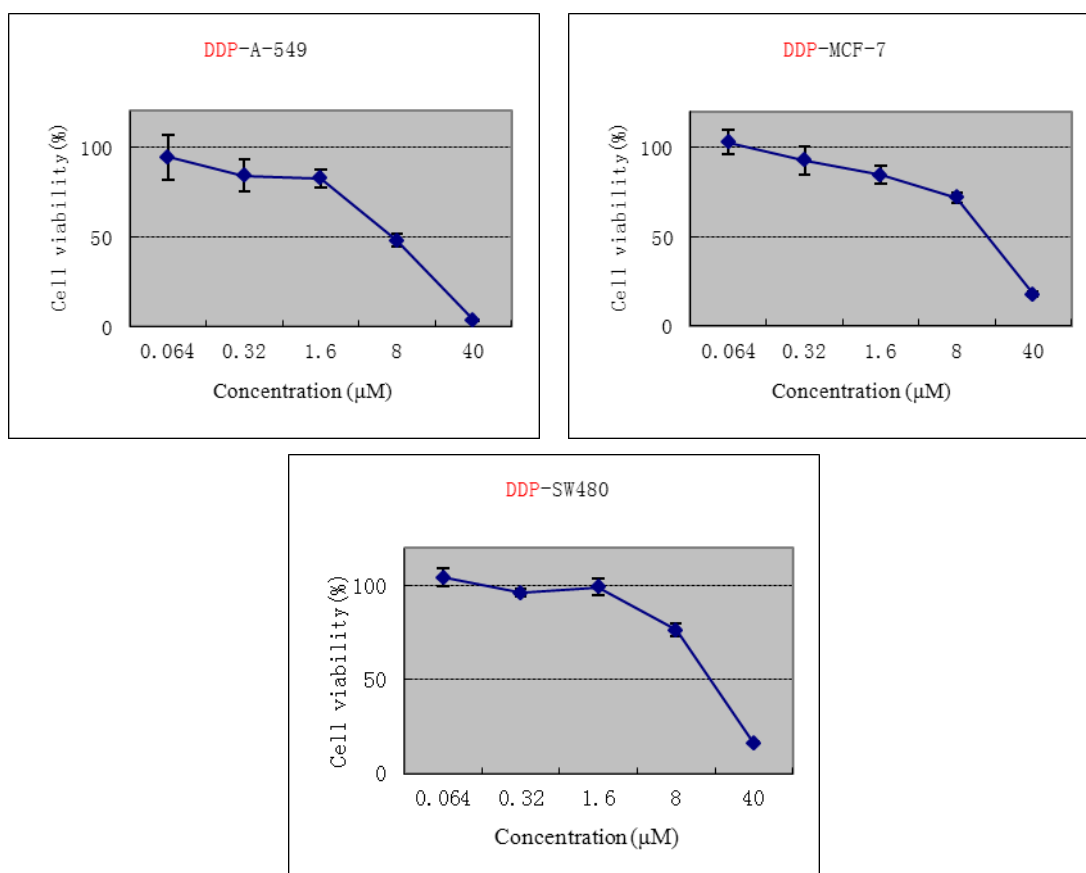Figure S2.  $^1\text{H-NMR}$  (600 Hz,  $\text{CDCl}_3$ ) spectrum of the new compound acerolanin A.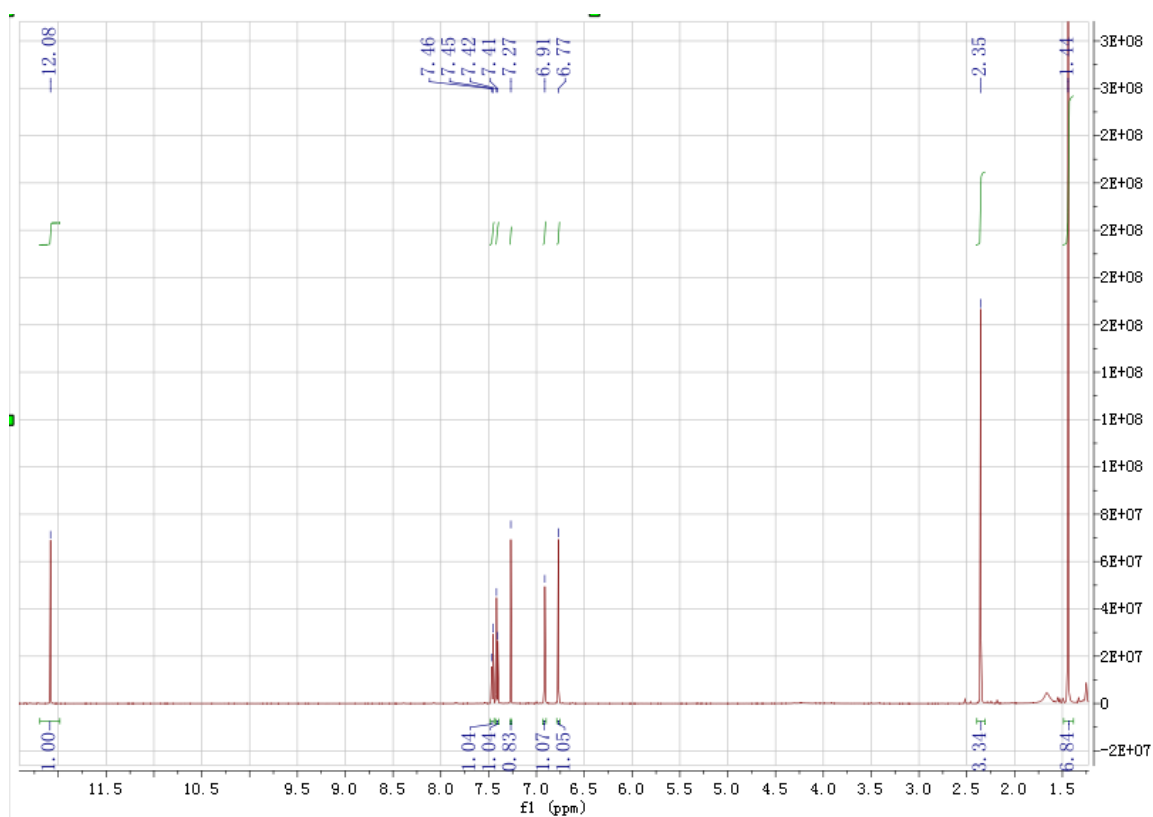

**Figure S3.**  $^{13}\text{C}$ -NMR (125 MHz,  $\text{CDCl}_3$ ) spectrum of the new compound acerolanin A.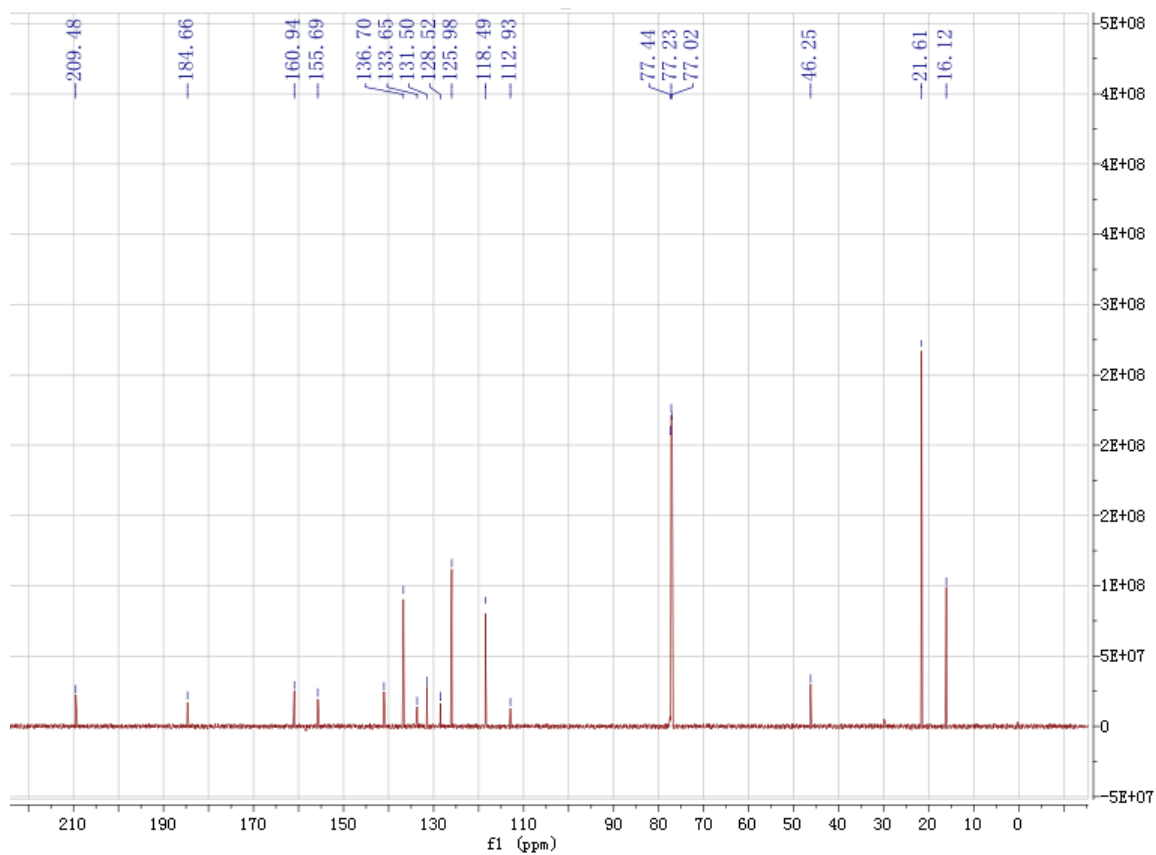**Figure S4.** The HMBC spectrum of the new compound acerolanin A.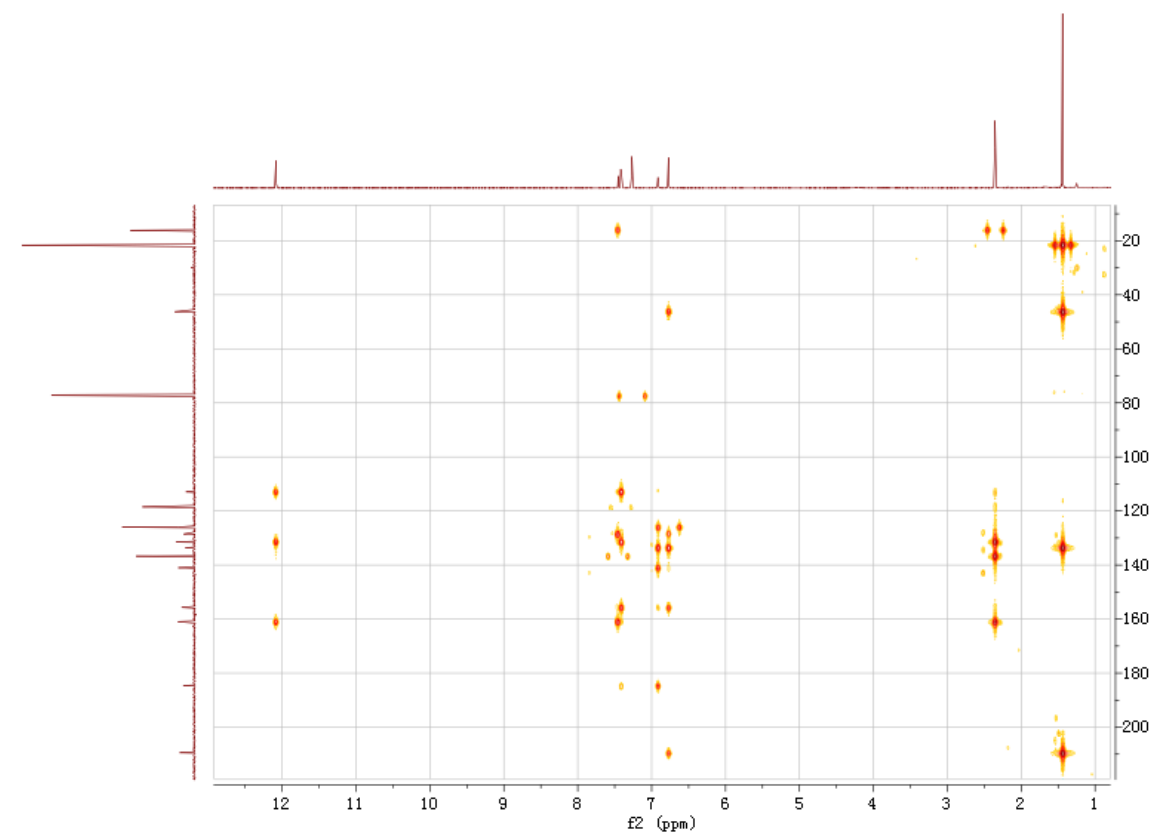

**Figure S5.** The HSQC spectrum of the new compound acerolanin A.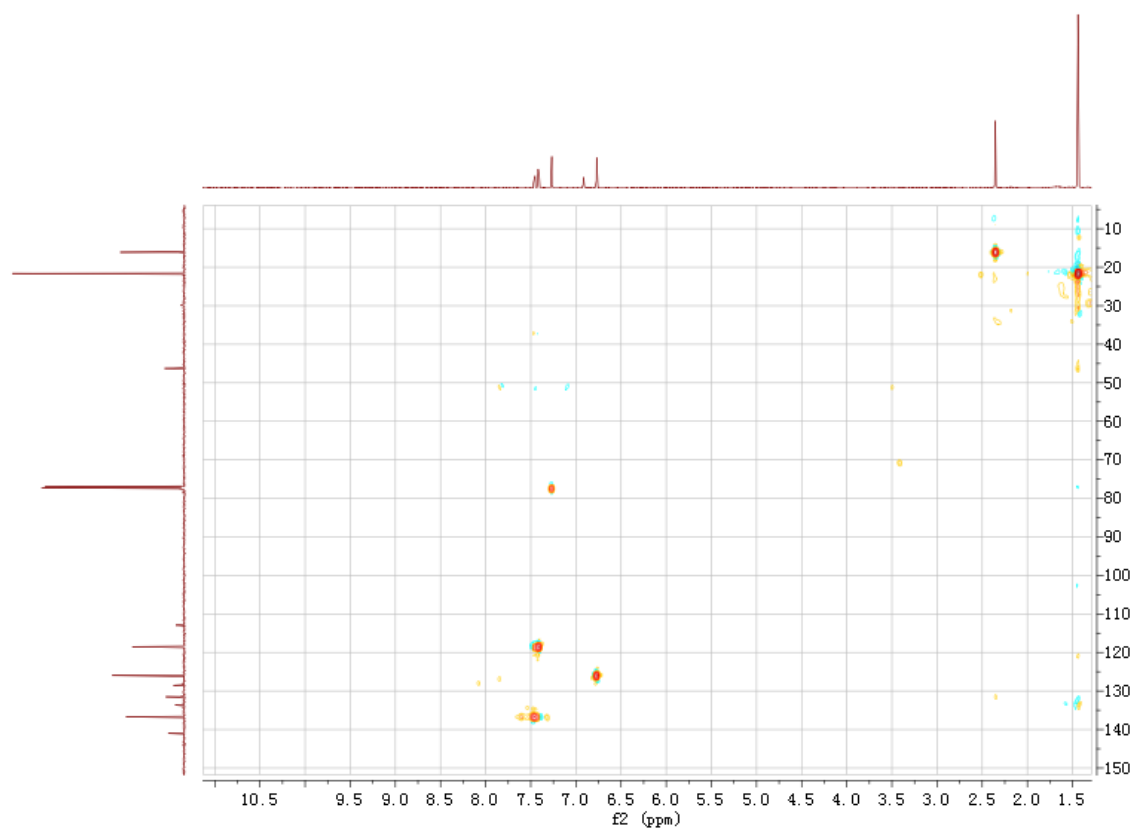**Figure S6.**  $^1\text{H}$ - $^1\text{H}$  COSY spectrum of the new compound acerolanin A.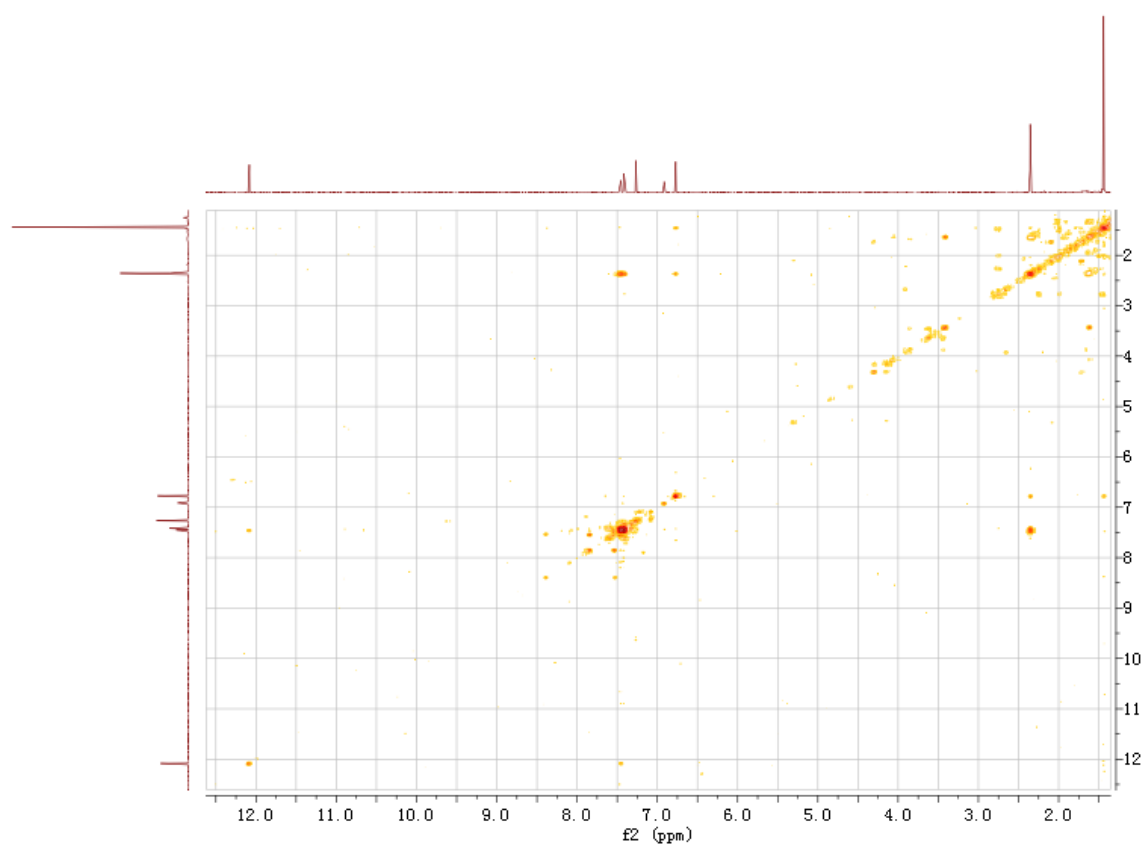

**Figure S7.**  $^1\text{H-NMR}$  (600 MHz,  $\text{CDCl}_3$ ) spectrum of the new compound acerolanin **B**.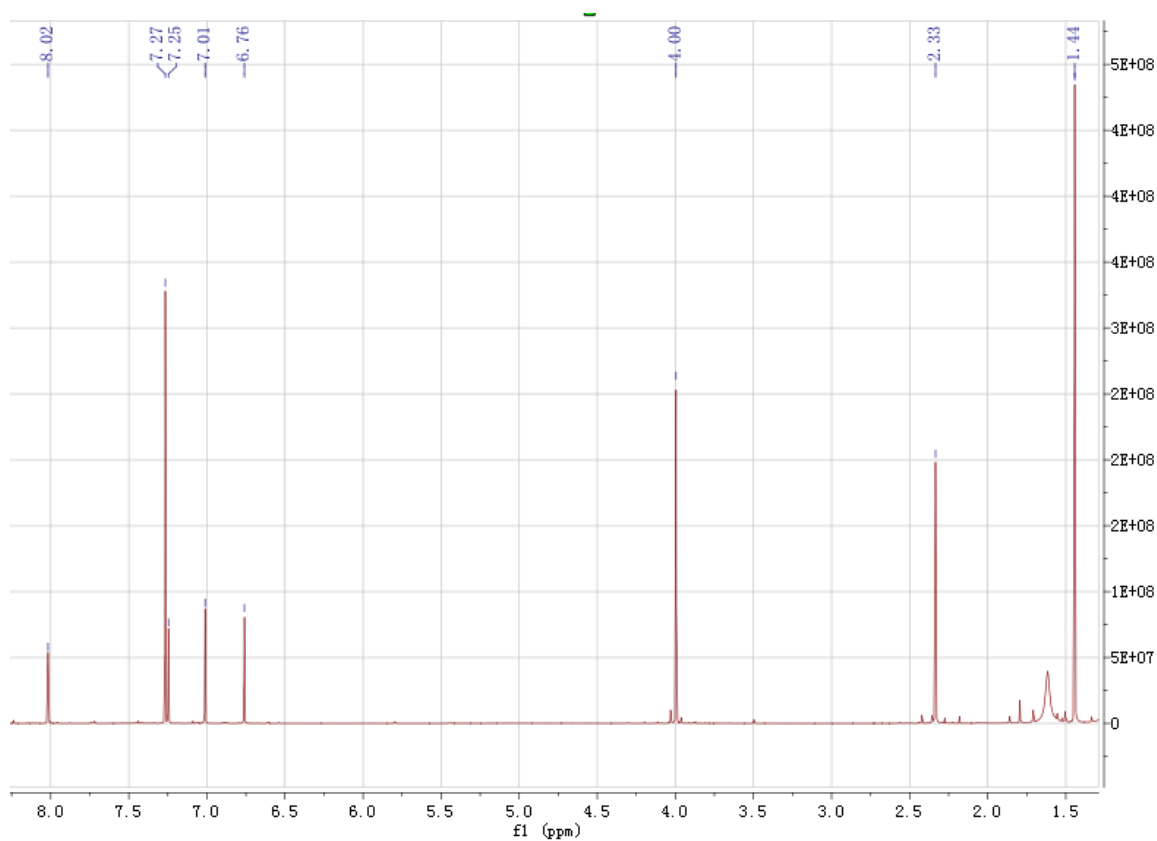**Figure S8.**  $^{13}\text{C-NMR}$  (125 MHz,  $\text{CDCl}_3$ ) spectrum of the new compound acerolanin **B**.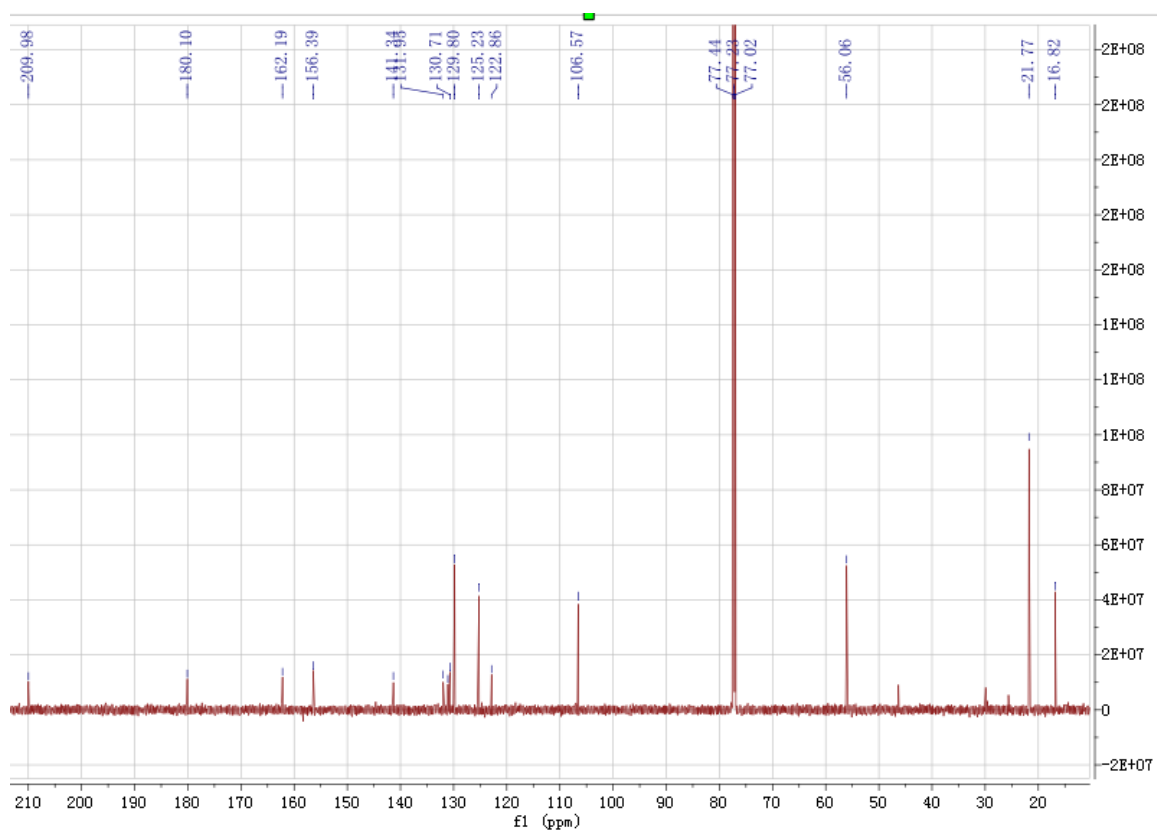

**Figure S9.** The HMBC spectrum of the new compound acerolanin B.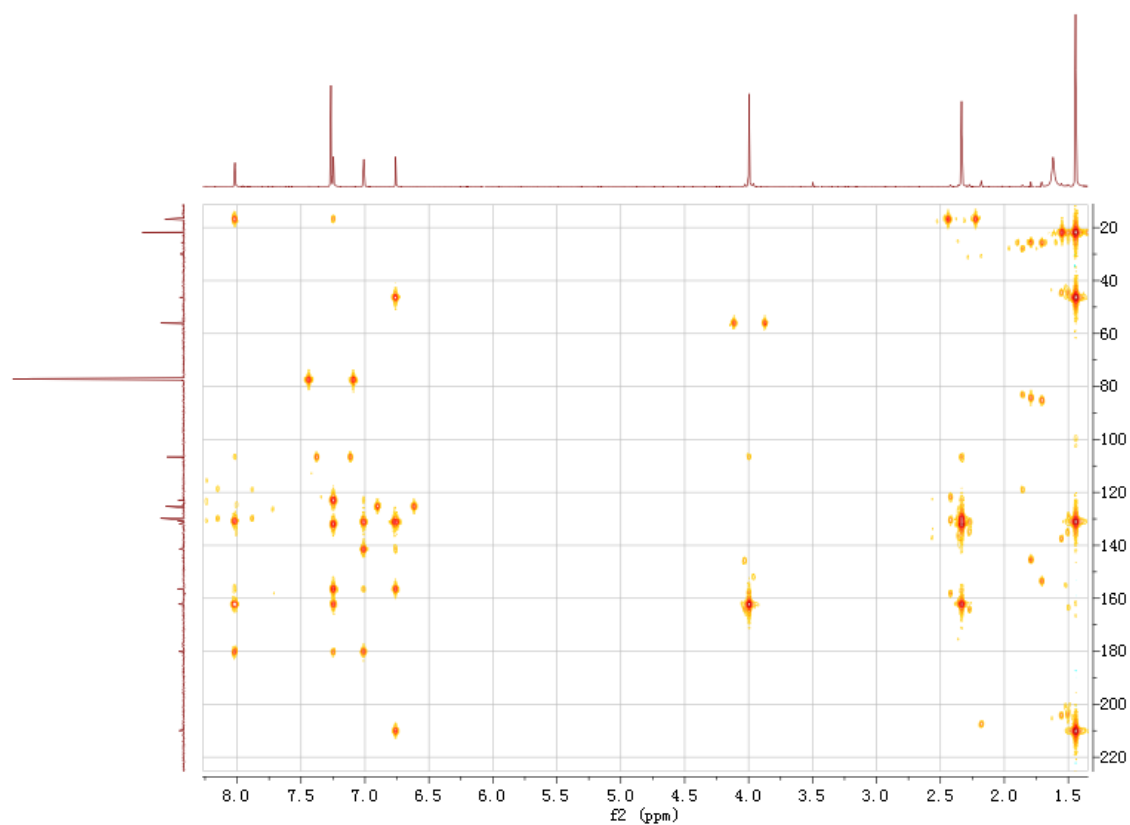**Figure S10.** The HSQC spectrum of the new compound acerolanin B.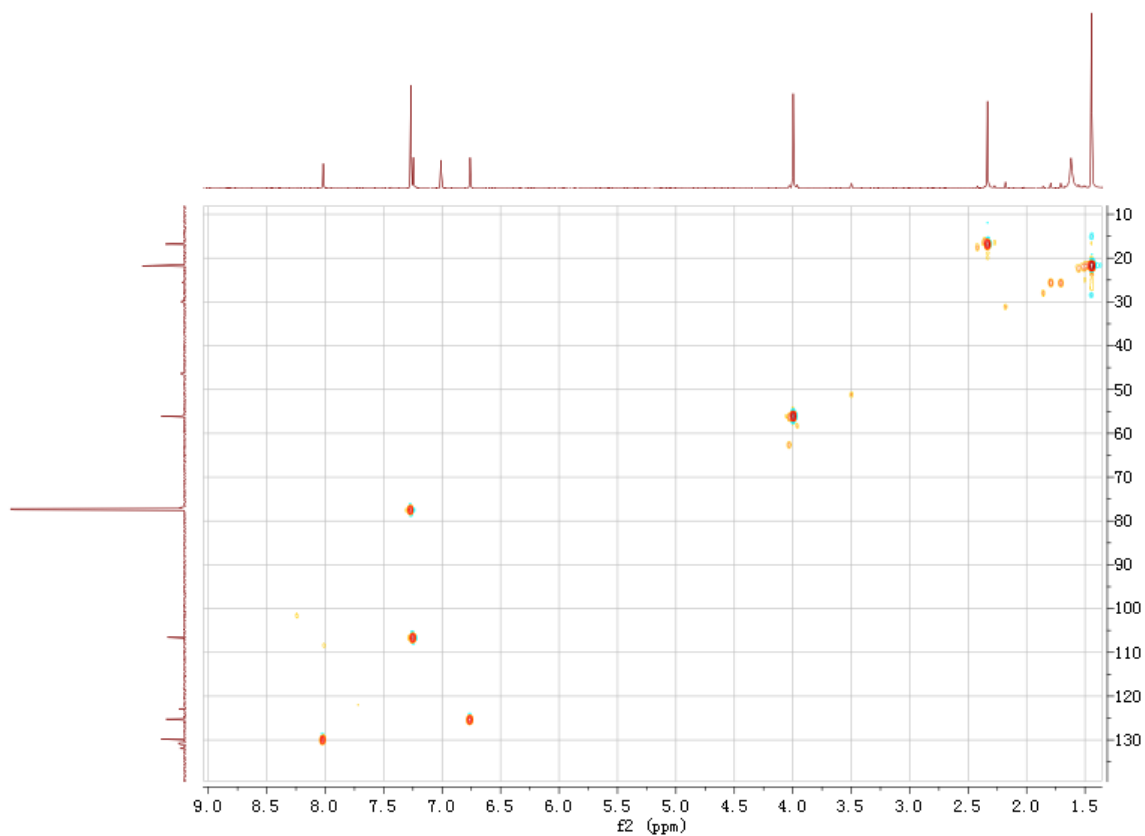

**Figure S11.**  $^1\text{H}$ - $^1\text{H}$  COSY spectrum of the new compound acerolanin B.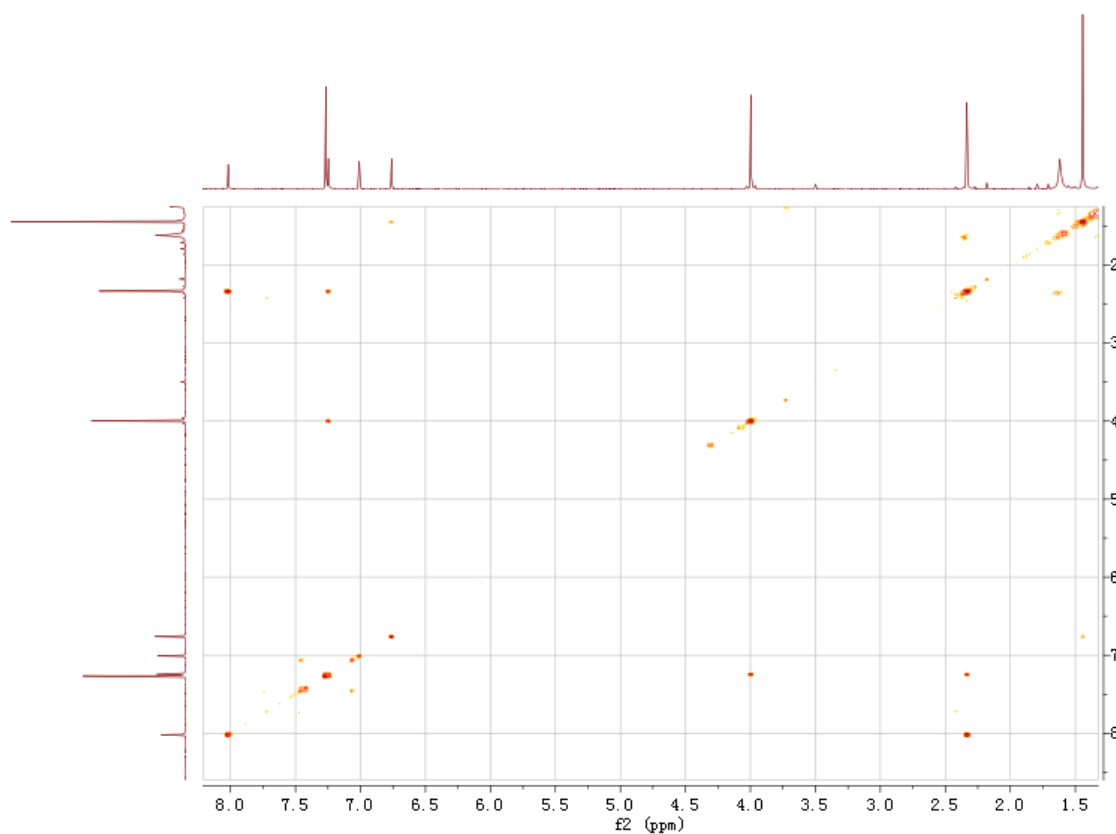**Figure S12.**  $^1\text{H}$ -NMR (600 MHz,  $\text{CDCl}_3$ ) spectrum of the new compound acerolanin C.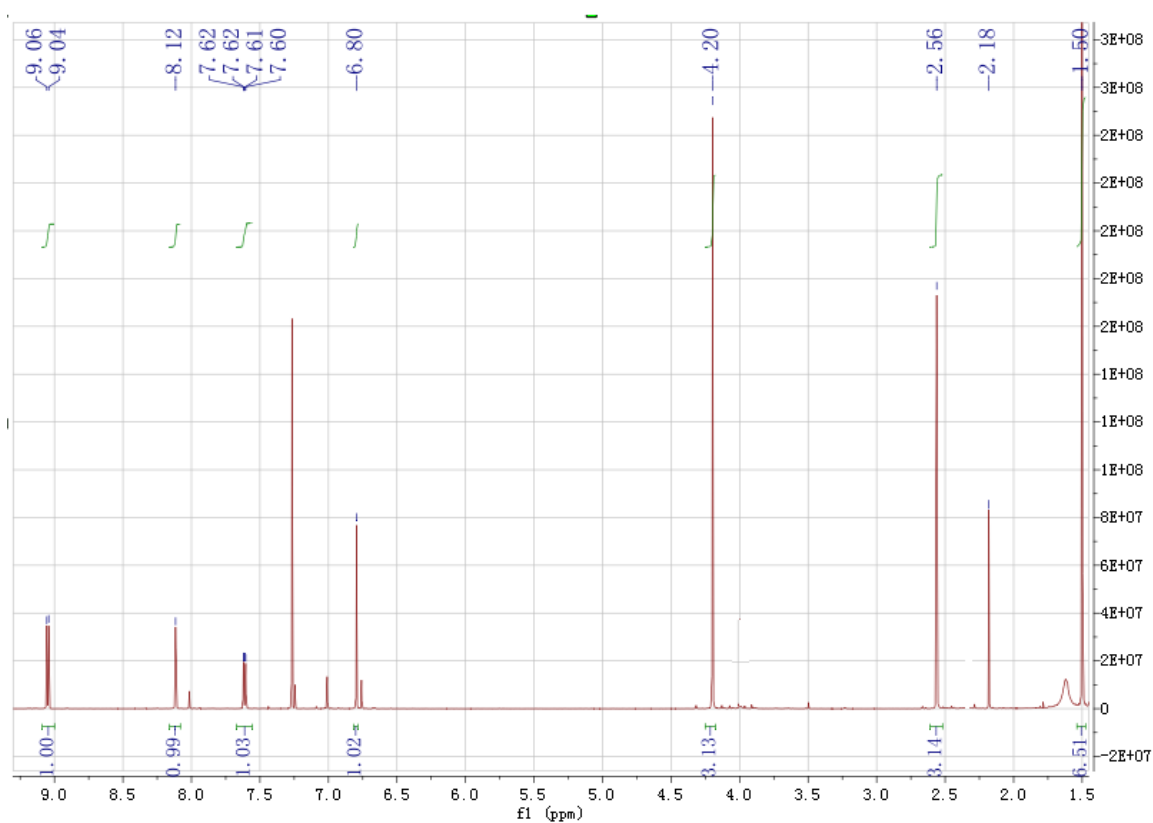



**Figure S13.**  $^{13}\text{C}$ -NMR (125 MHz,  $\text{CDCl}_3$ ) spectrum of the new compound acerolanin C.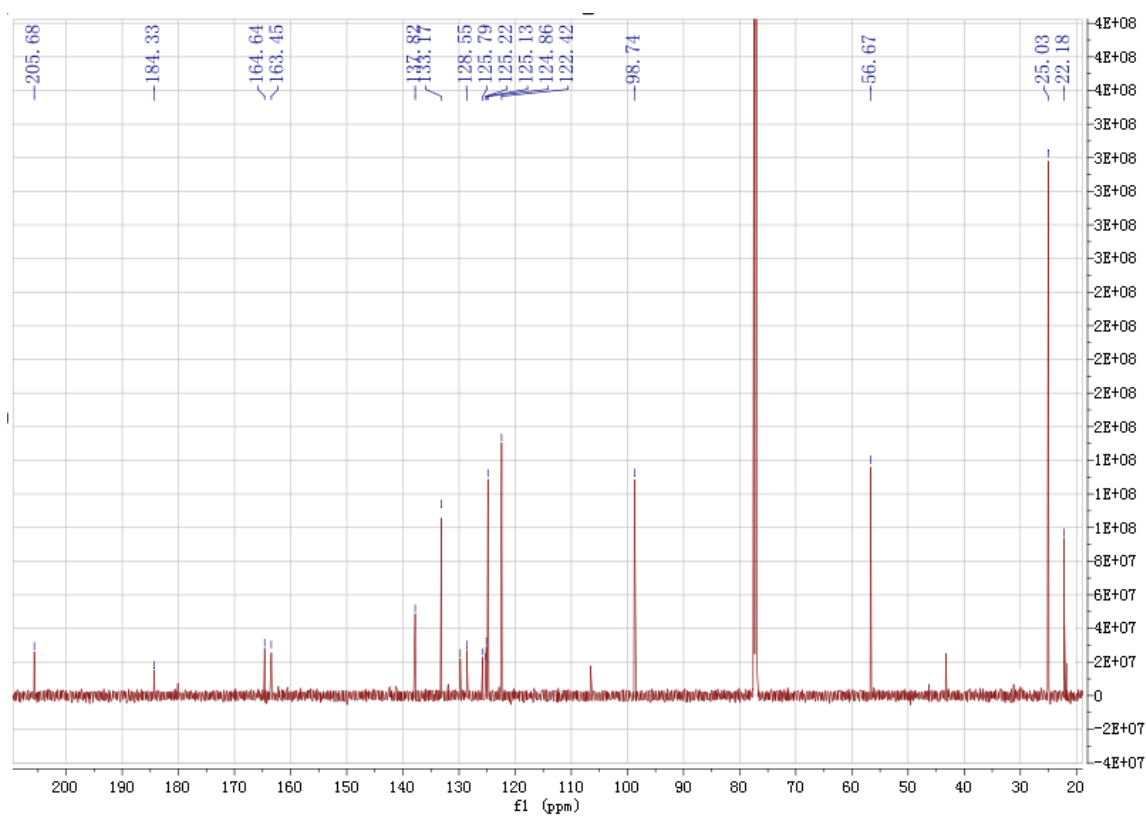**Figure S14.** The HMBC spectrum of the new compound acerolanin C.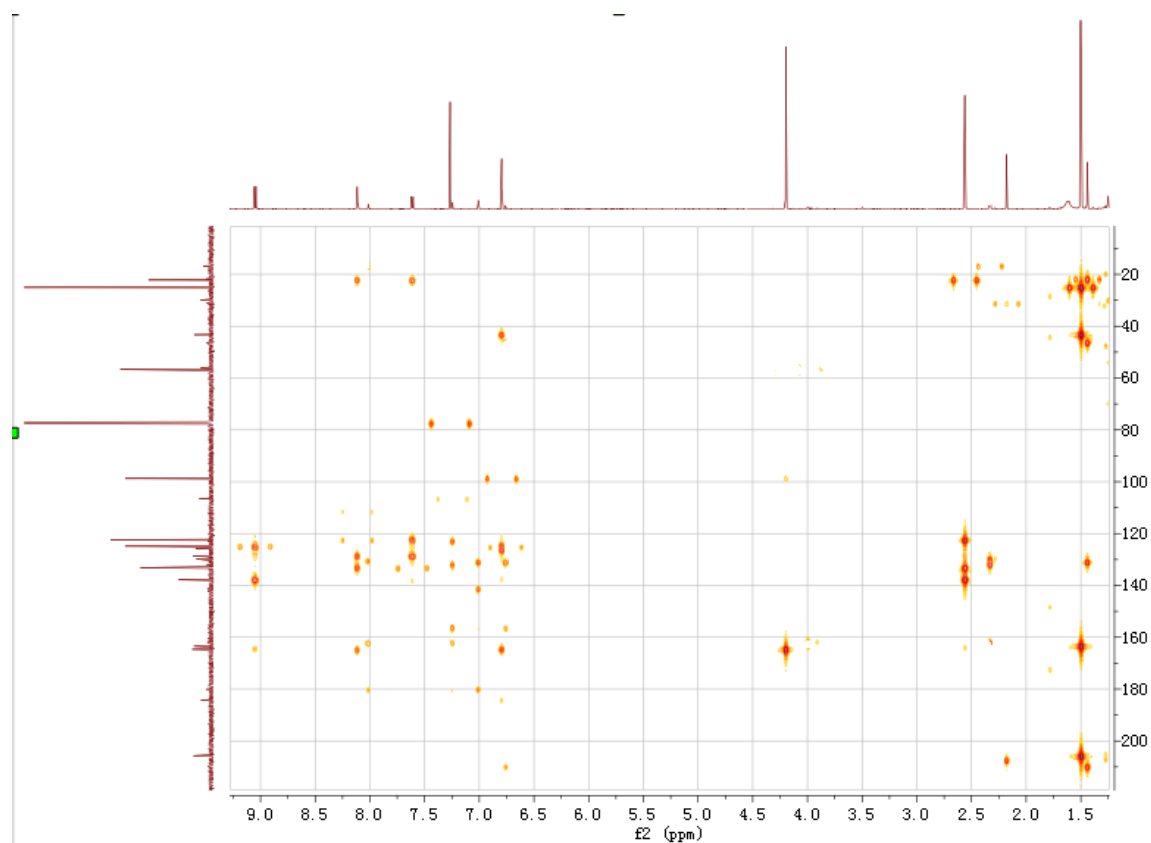

**Figure S15.** The HSQC spectrum of the new compound acerolanin C.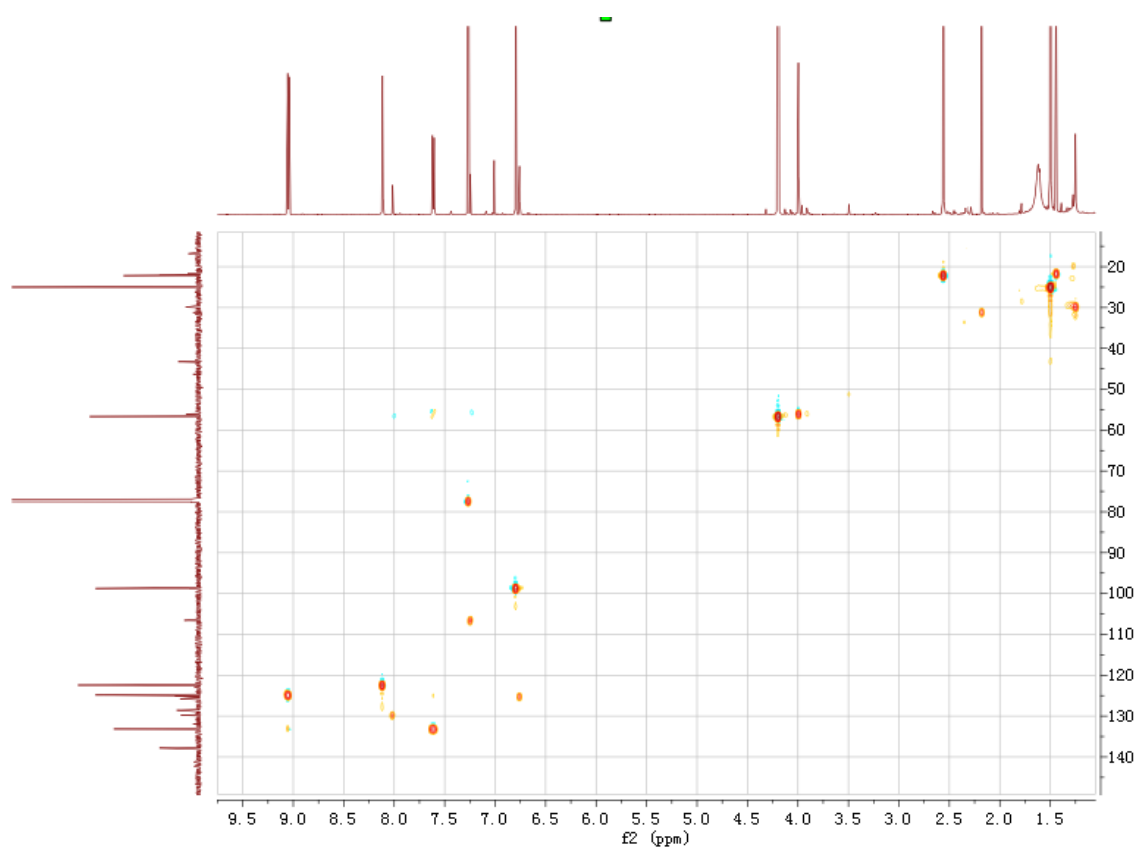**Figure S16.**  $^1\text{H}$ - $^1\text{H}$  COSY spectrum of the new compound acerolanin C.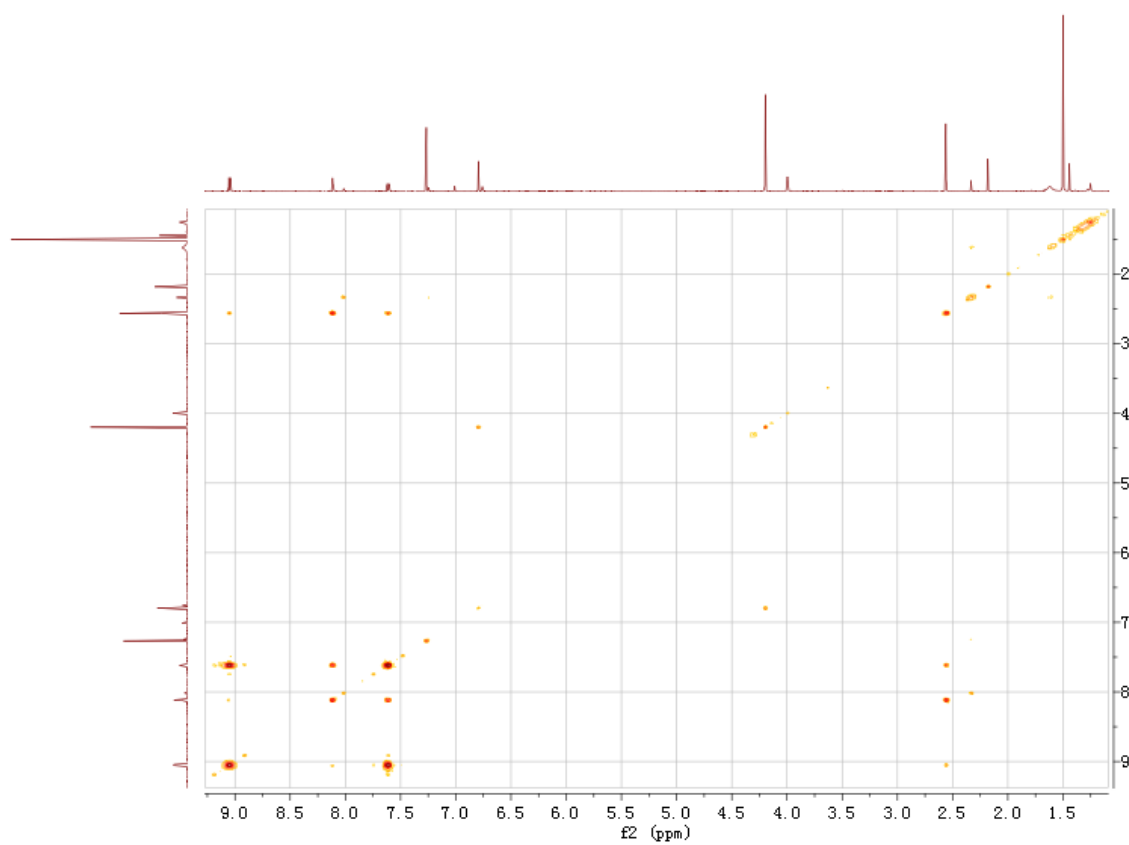

Supplement: molecules-19-02629-s001.pdf [file molecules-19-02629-s001.pdf]
